# Supplementary material
Source: PubMed Central journal article supplement (PMC2692559)
Supplement: NIHMS96695-supplement-supplement_1.pdf [file NIHMS96695-supplement-supplement_1.pdf]

**Supplemental Table 1.** Genotype frequency for genetic variants in African American patients with a sustained virological response (SVR) and non-response (NR) - HALT-C Study.

| <b>Gene</b>        | <b>Variant*/<br/>Protein</b> | <b>Genotype</b> | <b>SVR</b> | <b>%</b> | <b>NR</b> | <b>%</b> |    |
|--------------------|------------------------------|-----------------|------------|----------|-----------|----------|----|
| <i>IFNA1</i>       | -90G>A                       | AA              | 7          | 88       | 111       | 98       |    |
|                    |                              | GA              | 1          | 13       | 2         | 2        |    |
|                    |                              | GG              | 0          | 0        | 0         | 0        |    |
|                    |                              | GA+GG           | 1          | 13       | 2         | 2        |    |
|                    | Ex1+51T>C                    | TT              | 6          | 75       | 70        | 64       |    |
|                    |                              | CT              | 2          | 25       | 36        | 33       |    |
|                    |                              | CC              | 0          | 0        | 4         | 4        |    |
|                    |                              | CT+CC           | 2          | 25       | 40        | 36       |    |
|                    | <i>IFNAR1</i>                | IVS1-22T>G      | TT         | 4        | 36        | 51       | 43 |
|                    |                              |                 | GT         | 5        | 45        | 56       | 47 |
| GG                 |                              |                 | 2          | 18       | 13        | 11       |    |
| GT+GG              |                              |                 | 7          | 64       | 69        | 58       |    |
| Ex4-30G>C<br>V168L |                              | GG              | 6          | 55       | 84        | 71       |    |
|                    |                              | GC              | 4          | 36       | 33        | 28       |    |
|                    |                              | CC              | 1          | 9        | 2         | 2        |    |
|                    |                              | GC+CC           | 5          | 45       | 35        | 29       |    |
| <i>IFNAR2</i>      |                              | IVS1-4640G>A    | GG         | 8        | 100       | 82       | 74 |
|                    |                              |                 | GA         | 0        | 0         | 28       | 25 |
|                    | AA                           |                 | 0          | 0        | 1         | 1        |    |
|                    | GA+AA                        |                 | 0          | 0        | 29        | 26       |    |
|                    | Ex2-33T>C<br>F8S             | TT              | 10         | 91       | 107       | 89       |    |
|                    |                              | TC              | 0          | 0        | 13        | 11       |    |
|                    |                              | CC              | 1          | 9        | 0         | 0        |    |
|                    |                              | TC+CC           | 1          | 9        | 13        | 11       |    |
|                    | Ex2-28T>G<br>F10V            | TT              | 8          | 80       | 76        | 65       |    |
|                    |                              | TG              | 2          | 20       | 39        | 33       |    |
|                    |                              | GG              | 0          | 0        | 2         | 2        |    |
|                    |                              | TG+GG           | 2          | 20       | 41        | 35       |    |

|                            |       |   |    |     |    |
|----------------------------|-------|---|----|-----|----|
| IVS3-43T>C                 | CC    | 8 | 73 | 77  | 64 |
|                            | TC    | 2 | 18 | 41  | 34 |
|                            | TT    | 1 | 9  | 2   | 2  |
|                            | TC+TT | 3 | 27 | 43  | 36 |
| IVS6-50A>G                 | GG    | 5 | 63 | 71  | 64 |
|                            | AG    | 3 | 38 | 35  | 32 |
|                            | AA    | 0 | 0  | 5   | 5  |
|                            | AG+AA | 3 | 38 | 40  | 36 |
| <i>JAK1</i><br>IVS2+867T>G | TT    | 3 | 27 | 33  | 28 |
|                            | GT    | 3 | 27 | 63  | 53 |
|                            | GG    | 5 | 45 | 24  | 20 |
|                            | GT+GG | 8 | 73 | 87  | 73 |
| IVS4-186G>C                | GG    | 8 | 73 | 76  | 63 |
|                            | GC    | 3 | 27 | 40  | 33 |
|                            | CC    | 0 | 0  | 4   | 3  |
|                            | GC+CC | 3 | 27 | 44  | 37 |
| IVS6-27C>T                 | CC    | 7 | 64 | 39  | 33 |
|                            | TC    | 4 | 36 | 59  | 49 |
|                            | TT    | 0 | 0  | 22  | 18 |
|                            | TC+TT | 4 | 36 | 81  | 68 |
| IVS10-720A>G               | AA    | 7 | 64 | 47  | 39 |
|                            | AG    | 4 | 36 | 55  | 46 |
|                            | GG    | 0 | 0  | 18  | 15 |
|                            | AG+GG | 4 | 36 | 73  | 61 |
| Ex14+62C>T<br>S671S        | CC    | 8 | 73 | 78  | 66 |
|                            | CT    | 3 | 27 | 38  | 32 |
|                            | TT    | 0 | 0  | 3   | 3  |
|                            | CT+TT | 3 | 27 | 41  | 34 |
| Ex14-19C>G<br>A687A        | CC    | 9 | 82 | 113 | 95 |
|                            | CG    | 2 | 18 | 6   | 5  |
|                            | GG    | 0 | 0  | 0   | 0  |
|                            | CG+GG | 2 | 18 | 6   | 5  |

|              |              |       |    |     |     |    |
|--------------|--------------|-------|----|-----|-----|----|
|              | Ex15-53A>G   | AA    | 5  | 45  | 43  | 38 |
|              | P721P        | GA    | 6  | 55  | 50  | 44 |
|              |              | GG    | 0  | 0   | 20  | 18 |
|              |              | GA+GG | 6  | 55  | 70  | 62 |
|              | IVS22+112G>T | GG    | 9  | 82  | 76  | 64 |
|              |              | GT    | 2  | 18  | 38  | 32 |
|              |              | TT    | 0  | 0   | 5   | 4  |
|              |              | GT+TT | 2  | 18  | 43  | 36 |
| <i>TYK2</i>  | -2256A>T     | TT    | 0  | 0   | 52  | 43 |
|              |              | AT    | 7  | 70  | 50  | 42 |
|              |              | AA    | 3  | 30  | 18  | 15 |
|              |              | AT+AA | 10 | 100 | 68  | 57 |
|              | IVS2-69G>A   | GG    | 7  | 64  | 88  | 73 |
|              |              | AG    | 4  | 36  | 30  | 25 |
|              |              | AA    | 0  | 0   | 2   | 2  |
|              |              | AA+AG | 4  | 36  | 32  | 27 |
|              | Ex15+4T>G    | TT    | 11 | 100 | 113 | 95 |
|              | I684S        | TG    | 0  | 0   | 6   | 5  |
|              |              | GG    | 0  | 0   | 0   | 0  |
|              |              | TG+GG | 0  | 0   | 6   | 5  |
| <i>STAT1</i> | Ex3+64T>C    | TT    | 10 | 91  | 104 | 87 |
|              | L21L         | CT    | 1  | 9   | 15  | 13 |
|              |              | CC    | 0  | 0   | 1   | 1  |
|              |              | CT+CC | 1  | 9   | 16  | 13 |
|              | IVS12-103C>T | CC    | 4  | 36  | 70  | 59 |
|              |              | TC    | 7  | 64  | 32  | 27 |
|              |              | TT    | 0  | 0   | 17  | 14 |
|              |              | TC+TT | 7  | 64  | 49  | 41 |
|              | IVS21-8C>T   | CC    | 8  | 73  | 83  | 69 |
|              |              | TC    | 3  | 27  | 36  | 30 |
|              |              | TT    | 0  | 0   | 1   | 1  |
|              |              | TC+TT | 3  | 27  | 37  | 31 |

|                |                     |       |    |     |     |    |
|----------------|---------------------|-------|----|-----|-----|----|
| <i>STAT2</i>   | Ex20+58<br>M594I    | CC    | 11 | 100 | 116 | 98 |
|                |                     | CG    | 0  | 0   | 2   | 2  |
|                |                     | GG    | 0  | 0   | 0   | 0  |
|                |                     | CG+GG | 0  | 0   | 2   | 2  |
| <i>ADAR</i>    | Ex2-451A>G<br>K384R | GG    | 2  | 18  | 38  | 32 |
|                |                     | AG    | 6  | 55  | 61  | 52 |
|                |                     | AA    | 3  | 27  | 19  | 16 |
|                |                     | AG+AA | 9  | 82  | 80  | 68 |
|                | Ex9+14G>A<br>V849V  | GG    | 6  | 55  | 54  | 45 |
|                |                     | AG    | 3  | 27  | 51  | 43 |
|                |                     | AA    | 2  | 18  | 15  | 13 |
|                |                     | AG+AA | 5  | 45  | 66  | 55 |
|                | Ex15+1095C>T        | TT    | 6  | 55  | 75  | 63 |
|                |                     | CT    | 2  | 18  | 39  | 33 |
|                |                     | CC    | 3  | 27  | 5   | 4  |
|                |                     | CT+CC | 5  | 45  | 44  | 37 |
| <i>EIF2AK2</i> | Ex2+87C>G           | CC    | 11 | 100 | 118 | 98 |
|                |                     | CG    | 0  | 0   | 2   | 2  |
|                |                     | GG    | 0  | 0   | 0   | 0  |
|                |                     | CG+GG | 0  | 0   | 2   | 2  |
|                | Ex2+110C>T          | CC    | 8  | 73  | 85  | 71 |
|                |                     | CT    | 2  | 18  | 32  | 27 |
|                |                     | TT    | 1  | 9   | 2   | 2  |
|                |                     | CT+TT | 3  | 27  | 34  | 29 |
|                | IVS3+746A>G         | GG    | 2  | 18  | 58  | 48 |
|                |                     | AG    | 6  | 55  | 43  | 36 |
|                |                     | AA    | 3  | 27  | 19  | 16 |
|                |                     | AG+AA | 9  | 82  | 62  | 52 |
|                | IVS4-206A>G         | AA    | 8  | 73  | 88  | 75 |
|                |                     | GA    | 3  | 27  | 27  | 23 |
|                |                     | GG    | 0  | 0   | 3   | 3  |
|                |                     | GA+GG | 3  | 27  | 30  | 25 |

|              |               |       |    |    |    |    |
|--------------|---------------|-------|----|----|----|----|
|              | IVS5-70T>C    | TT    | 7  | 64 | 83 | 69 |
|              |               | TC    | 3  | 27 | 31 | 26 |
|              |               | CC    | 1  | 9  | 6  | 5  |
|              |               | TC+CC | 4  | 36 | 37 | 31 |
| <i>NFKB1</i> | IVS1+11190A>T | AA    | 10 | 91 | 91 | 77 |
|              |               | AT    | 1  | 9  | 26 | 22 |
|              |               | TT    | 0  | 0  | 1  | 1  |
|              |               | AT+TT | 1  | 9  | 27 | 23 |
|              | IVS2-826A>T   | AA    | 8  | 73 | 80 | 69 |
|              |               | AT    | 3  | 27 | 34 | 29 |
|              |               | TT    | 0  | 0  | 2  | 2  |
|              |               | AT+TT | 3  | 27 | 36 | 31 |
|              | IVS5+4216G>C  | GG    | 3  | 27 | 46 | 39 |
|              |               | CG    | 6  | 55 | 51 | 43 |
|              |               | CC    | 2  | 18 | 22 | 18 |
|              |               | CG+CC | 8  | 73 | 73 | 61 |
|              | IVS12-458G>C  | GG    | 6  | 55 | 75 | 63 |
|              |               | CG    | 5  | 45 | 36 | 30 |
|              |               | CC    | 0  | 0  | 9  | 8  |
|              |               | CG+CC | 5  | 45 | 45 | 38 |
|              | IVS23-1330T>C | CC    | 6  | 55 | 85 | 72 |
|              |               | CT    | 3  | 27 | 26 | 22 |
|              |               | TT    | 2  | 18 | 7  | 6  |
|              |               | CT+TT | 5  | 45 | 33 | 28 |
| <i>MXI</i>   | -5932G>T      | GG    | 8  | 73 | 68 | 59 |
|              |               | TG    | 3  | 27 | 43 | 37 |
|              |               | TT    | 0  | 0  | 5  | 4  |
|              |               | TG+TT | 3  | 27 | 48 | 41 |
|              | IVS3+673T>G   | TT    | 9  | 82 | 86 | 72 |
|              |               | TG    | 2  | 18 | 32 | 27 |
|              |               | GG    | 0  | 0  | 1  | 1  |

|                      |       |    |     |     |     |
|----------------------|-------|----|-----|-----|-----|
|                      | TG+GG | 2  | 18  | 33  | 28  |
| IVS3+725T>C          | CC    | 0  | 0   | 6   | 100 |
|                      | TC    | 5  | 13  | 33  | 87  |
|                      | TT    | 6  | 7   | 77  | 93  |
|                      | TC+TT | 11 | 100 | 110 | 95  |
| IVS5+404G>T          | TT    | 0  | 0   | 7   | 100 |
|                      | TG    | 5  | 14  | 30  | 86  |
|                      | GG    | 6  | 7   | 83  | 93  |
|                      | TG+GG | 11 | 100 | 113 | 94  |
| IVS5+577G>A          | AA    | 0  | 0   | 7   | 100 |
|                      | GA    | 5  | 14  | 30  | 86  |
|                      | GG    | 6  | 7   | 83  | 93  |
|                      | GA+GG | 11 | 100 | 113 | 94  |
| IVS11-198G>A         | AA    | 7  | 64  | 44  | 38  |
|                      | GA    | 3  | 27  | 47  | 41  |
|                      | GG    | 1  | 9   | 24  | 21  |
|                      | GA+GG | 4  | 36  | 71  | 62  |
| IVS11-21T>C          | TT    | 8  | 73  | 92  | 78  |
|                      | TC    | 3  | 27  | 24  | 20  |
|                      | CC    | 0  | 0   | 2   | 2   |
|                      | TC+CC | 3  | 27  | 26  | 22  |
| Ex13+4G>A<br>V379I   | AA    | 6  | 55  | 38  | 32  |
|                      | GA    | 3  | 27  | 53  | 44  |
|                      | GG    | 2  | 18  | 29  | 24  |
|                      | GA+GG | 5  | 45  | 82  | 68  |
| IVS14+43A>G          | AA    | 4  | 36  | 76  | 63  |
|                      | AG    | 6  | 55  | 40  | 33  |
|                      | GG    | 1  | 9   | 4   | 3   |
|                      | AG+GG | 7  | 64  | 44  | 37  |
| Ex16+114A>G<br>A541A | AA    | 3  | 27  | 71  | 62  |
|                      | AG    | 8  | 73  | 36  | 31  |
|                      | GG    | 0  | 0   | 8   | 7   |
|                      | AG+GG | 8  | 73  | 44  | 38  |

|             |              |       |    |    |     |    |
|-------------|--------------|-------|----|----|-----|----|
|             | Ex16-64G>A   | AA    | 7  | 64 | 75  | 63 |
|             | Q565Q        | AG    | 4  | 36 | 38  | 32 |
|             |              | GG    | 0  | 0  | 7   | 6  |
|             |              | AG+GG | 4  | 36 | 45  | 38 |
| <i>OAS1</i> | Ex3+15G>A    | AA    | 5  | 45 | 62  | 54 |
|             | G162S        | GA    | 5  | 45 | 40  | 35 |
|             |              | GG    | 1  | 9  | 13  | 11 |
|             |              | GA+GG | 6  | 55 | 53  | 46 |
|             | IVS3+2480T>G | GG    | 3  | 27 | 39  | 33 |
|             |              | TG    | 5  | 45 | 60  | 50 |
|             |              | TT    | 3  | 27 | 21  | 18 |
|             |              | TG+TT | 8  | 73 | 81  | 68 |
|             | Ex6+16G>A    | AA    | 9  | 90 | 100 | 83 |
|             | A352T        | AG    | 1  | 10 | 19  | 16 |
|             |              | GG    | 0  | 0  | 1   | 1  |
|             |              | AG+GG | 1  | 10 | 20  | 17 |
| <i>IRF3</i> | Ex1+95A>G    | AA    | 7  | 64 | 57  | 48 |
|             |              | GA    | 2  | 18 | 47  | 39 |
|             |              | GG    | 2  | 18 | 16  | 13 |
|             |              | GA+GG | 4  | 36 | 63  | 53 |
|             | Ex1-53T>C    | TT    | 10 | 91 | 104 | 90 |
|             |              | CT    | 1  | 9  | 12  | 10 |
|             |              | CC    | 0  | 0  | 0   | 0  |
|             |              | CT+CC | 1  | 9  | 12  | 10 |
|             | Ex1-40T>G    | TT    | 6  | 55 | 41  | 35 |
|             |              | GT    | 3  | 27 | 56  | 48 |
|             |              | GG    | 2  | 18 | 19  | 16 |
|             |              | GT+GG | 5  | 45 | 75  | 65 |
| IVS1+17C>T  | CC           | 6     | 55 | 42 | 36  |    |
|             | CT           | 3     | 27 | 57 | 49  |    |
|             | TT           | 2     | 18 | 17 | 15  |    |
|             | CT+TT        | 5     | 45 | 74 | 64  |    |

|           |       |   |    |    |    |
|-----------|-------|---|----|----|----|
| Ex8-81G>C | GG    | 4 | 36 | 54 | 45 |
| S427T     | CG    | 6 | 55 | 50 | 42 |
|           | CC    | 1 | 9  | 16 | 13 |
|           | CG+CC | 7 | 64 | 66 | 55 |
